# Supplementary material for: A Highly Selective and Non-Reaction Based Chemosensor for the Detection of Hg2+ Ions Using a Luminescent Iridium(III) Complex
Source: PLoS One. 2013 Mar 22;8(3):e60114. doi: 10.1371/journal.pone.0060114 (PMC3606269; doi:10.1371/journal.pone.0060114)
Supplement: Table S1 — Photophysical properties of the iridium complex 1. (DOCX) [file pone.0060114.s007.docx]

**Table S1**. Photophysical properties of the iridium complex **1** a

| Complex | UV-vis  λ/ nm ( dm3 mol–1 cm–1) | λmax  (nm) | φ | τ(µs) |
| --- | --- | --- | --- | --- |
| [Ir(dfppy)2(dnbpy)]PF6  (**1**) | 211 (3.06 x 104)  255 (3.18 x 104)  300 (2.19 x 104)  386 (sh)  450 (sh) | 490 | 0.10 | 4.53 |

a 50 μM solutions of complex **1** in degassed CH3CN at room temperature. Quantum yields were determined using [Ru(bpy)3]PF6 as reference.
